# Supplementary material for: Protective Mechanism of Eurotium amstelodami from Fuzhuan Brick Tea against Colitis and Gut-Derived Liver Injury Induced by Dextran Sulfate Sodium in C57BL/6 Mice
Source: MDPI journal article supplement (doi:10.3390/nu16081178), 2024-04-16
Supplement: s1 [file s1]

## Supplementary Materials

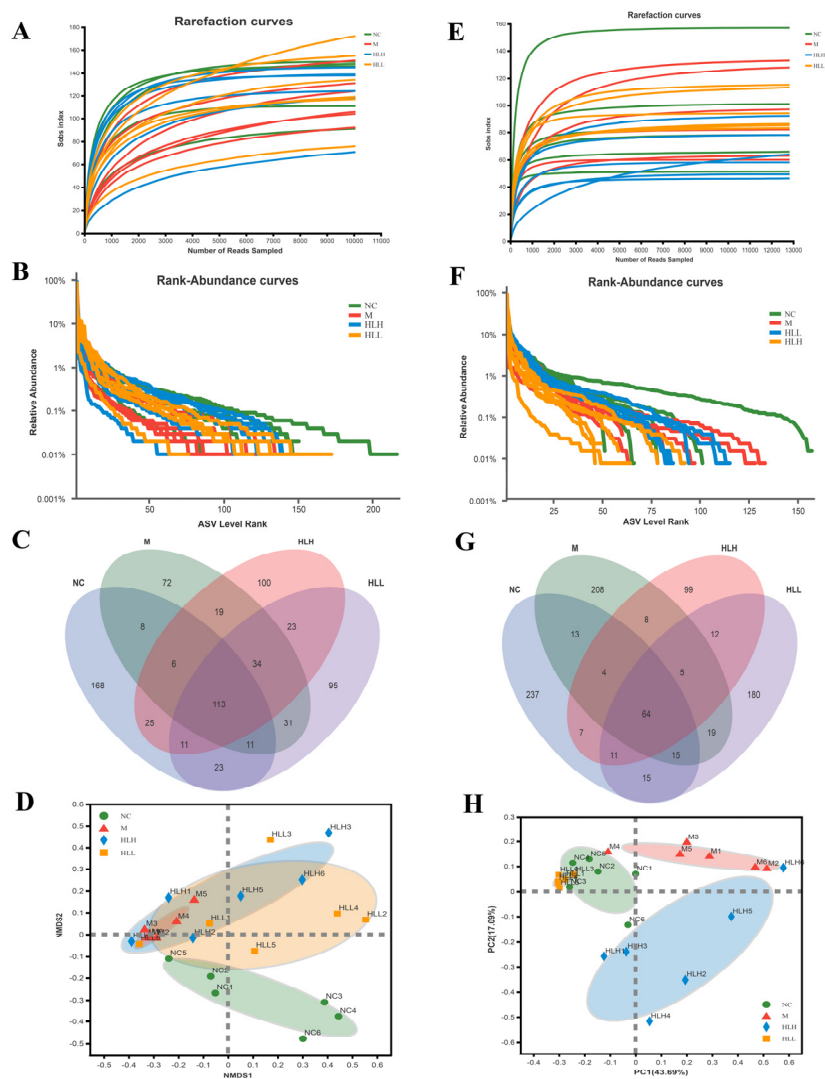

**Figure S1.** Bacterial and fungi community distribution. (A) Rarefaction curves based on Sobs index. (B) The grading curves, (C) Venn diagram analysis, (D) NMDS analysis based on Bray-Curtis algorithm of bacterial composition. (E) Rarefaction curves based on Sobs index. (F) The grading curves. (G) Venn diagram analysis. (H) PCA analysis of fungi composition.

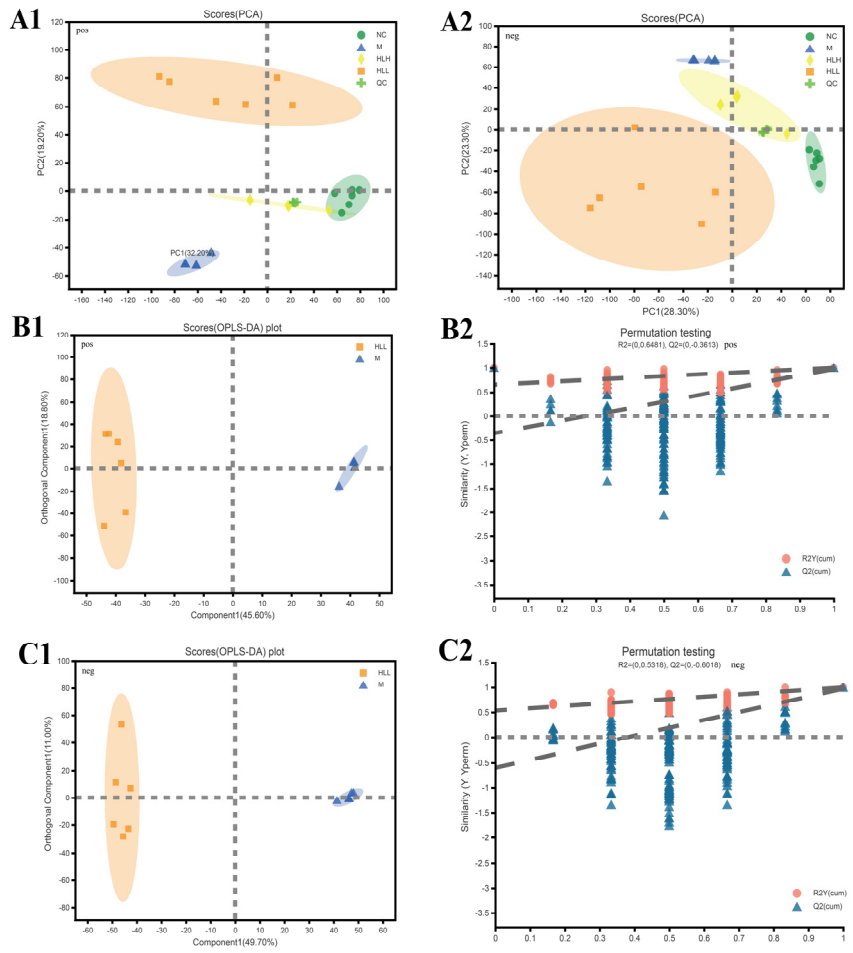

**Figure S2.** The effects of  $10^2$  spores/mL *E. amstelodami* H-1 (HLL) intervention on gut metabolism in colitis mice. PCA analysis of metabolome profiles (A1) positive and (A2) negative ion mode among the four groups of samples. OPLS-DA plot of metabolome profiles (B1, pos; C1, neg) and permutation testing (B2, pos; C2, neg) in HLL vs M (model).

**Table S1.** The standard scoring system of disease activity index (DAI).

| Score | Body weight loss | Feces status                           | Bloody stools                         |
|-------|------------------|----------------------------------------|---------------------------------------|
| 0     | no loss          | normal                                 | no blood (no color within 2 min)      |
| 1     | 0~10%            | loose stool (not attached to the anus) | presence (Within 1~2 min, fuchsia)    |
| 2     | 10%~15%          | loose stool (attach to the anus)       | presence (Within 1 min, fuchsia)      |
| 3     | 15%~20%          | diarrhea (liquid)                      | presence (Within 1 min, fuchsia)      |
| 4     | >20%             | severe diarrhea                        | gross blood (Instantly purplish blue) |

**Table S2.** Sequences of Mouse Primers used for RT-PCR Analysis.

| Primers       | F                       | R                      |
|---------------|-------------------------|------------------------|
| IL-1 $\beta$  | GCAACTGTTCTGAACTCAACT   | ATCTTTTGGGGTCCGTCAACT  |
| IL-6          | TAGTCCTTCCTACCCCAATTTCC | TTGGTCCTTAGCCACTCCTTC  |
| IL-10         | CTTACTGACTGGCATGAGGATCA | GCAGCTCTAGGAGCATGTGG   |
| TNF- $\alpha$ | CCTGTAGCCCACGTCGTAG     | GGGAGTAGACAAGGTACAACCC |
| TLR4          | GCCTTTTCAGGGAATTAAGCTCC | GATCAACCGATGGACGTGTAAG |
| p65           | GCTTTGCAAACCTGGGAATA    | TCCGCCTTCTGCTTGTAGAT   |
| Nrf2          | TAGATGACCATGAGTCGCTTGC  | GCCAAACTTGCTCCATGTCC   |
| COX-2         | TTCAACACACTCTATCACTGGC  | AGAAGCGTTTGCGGTACTCAT  |
| iNOS          | GGAGTGACGGCAAACATGACT   | TCGATGCACAACCTGGGTGAAC |
| ASC           | CATCTTGTCTTGGCTGGTGGTCT | CGGACACGGACAGGATTGACA  |
| Caspase-1     | AATACAACCACTCGTACACGTC  | AGCTCCAACCCTCGGAGAAA   |
| NLRP3         | TGTGAGAAGCAGGTTCTACTCT  | TGTAGCGACTGTTGAGGTTCCA |
| FXR           | CTGCTTGTGATGCCACTTACA   | TAGCACACGCTTCTCTCAGGT  |
| PXR           | TAGGGACCTGCCTATTGAGGA   | CCGTTTCCGTGTCGAACATC   |
| TGR5          | CCTGGAACCTCTGTTATCGCTCA | GCACTCGTAGACACCTTTGGG  |
| GADPH         | GCTCTGGCTCCTAGCACCAT    | GCCACCGATCCACACAGAGT   |
